# Supplementary material for: On the CCN (de)activation nonlinearities
Source: Copernicus journal article supplement (doi:10.5194/npg-24-535-2017), 2017-09-05
Supplement: Supplementary file 1 [file npg-24-535-2017-supplement.zip]

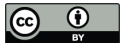

## *Supplement of* **On the CCN (de)activation nonlinearities**

**Sylwester Arabas and Shin-ichiro Shima**

*Correspondence to:* Sylwester Arabas ([sarabas@chathamfinancial.eu](mailto:sarabas@chathamfinancial.eu)) and Shin-ichiro Shima ([s\\_shima@sim.u-hyogo.ac.jp](mailto:s_shima@sim.u-hyogo.ac.jp))

- [npg-24-535-2017-supplement-title-page.pdf](#)
- [hysteresis-npg](#)
  - [CMakeLists.txt](#)
  - [main.cpp](#)
  - [plots](#)
    - \* [cusp\\_new.gpi](#)
    - \* [koehler.gpi](#)
  - [src](#)
    - \* [gslerr.hpp](#)
    - \* [hdf5io.hpp](#)
    - \* [invfft.hpp](#)
    - \* [odeset.hpp](#)
    - \* [rmanip.hpp](#)
    - \* [solver.hpp](#)
    - \* [zintrp.hpp](#)
  - [tests](#)
    - \* [CMakeLists.txt](#)
    - \* [bidisp](#)
    - \* [common](#)
    - \* [consvr](#)
    - \* [cspcat](#)
    - \* [dtrtol](#)
    - \* [invfft](#)
    - \* [nokhlr](#)
    - \* [nrmfrm](#)
    - \* [rhloop](#)
    - \* [zintrp](#)

The copyright of individual parts of the supplement might differ from the CC BY 3.0 License.
